# Supplementary material for: Shape auxiliary approach for carboxylate-functionalized gold nanocrystals
Source: Royal Society of Chemistry journal article supplement (doi:10.1039/b820220f), 2009-01-01
Supplement: b820220f.pdf [file b820220f.pdf]

## Supplementary Information

# Shape Auxiliary Approach for Carboxylate-Functionalized Gold Nanocrystals

Daeha Seo, Choong Il Yoo, Bong Hyun Chung, Im Sik Chung\* and Hyunjoon Song\*

*Department of Chemistry and School of Molecular Science (BK21),  
Korea Advanced Institute of Science and Technology, Daejeon 305-701, Korea,  
and BioNanotechnology Research Center, Korea Research Institute of Bioscience and  
Biotechnology (KRIBB), Daejeon 305-333, Korea*

E-mail: [hsong@kaist.ac.kr](mailto:hsong@kaist.ac.kr), [cis123@kribb.re.kr](mailto:cis123@kribb.re.kr)

## Experimental Section

**Chemicals.** Tetrachloroaurate trihydrate ( $\text{HAuCl}_4 \cdot 3\text{H}_2\text{O}$ , 99.9+%, Aldrich), silver nitrate ( $\text{AgNO}_3$ , 99+%, Aldrich), 1,5-pentanediol (PD, 96%, Aldrich), 2-(dimethylamino)ethanol (DMAE, 99.0%, TCI), poly(acrylic acid) (PAA, 35 wt% solution in water,  $M_w = 100,000$ , Aldrich), and poly(2-hydroxyethyl methacrylate) (PHEMA,  $M_w = 20,000$ , Scientific Polymer Products) were used without further purification. Poly(dimethylaminoethyl methacrylate) (PDMAEMA, 18.45% solution in toluene, Scientific Polymer Products) was used after solvent evaporation.

**Synthesis of gold particles in the presence of PAA (reaction A).** A PD solution of  $\text{AgNO}_3$  (0.15 mM, 5.0 mM) was added to boiling PD (5.0 mL). Then PAA (3.0 mL, 1.0 M) and  $\text{HAuCl}_4$  (3.0 mL, 0.050 M) PD solutions were periodically added every 30 s over 7.5 min, and the mixture was refluxed for additional 1 h. The particles were precipitated by centrifugation, and were thoroughly washed with ethanol in a precipitation/dispersion cycle.

**Synthesis of gold octahedrons in the presence of PAA and DMAE (reaction B).** A PD solution of  $\text{AgNO}_3$  (0.15 mM, 5.0 mM) was added to boiling PD (5.0 mL). Then PD solutions of PAA (1.5 mL, 2.0 M), DMAE (1.5 mL, 2.0 M), and  $\text{HAuCl}_4$  (3.0 mL, 0.050 M) were periodically added every 30 s over 7.5 min, and the mixture was refluxed for additional 1 h. The particles were precipitated by centrifugation, and were thoroughly washed with ethanol in a precipitation/dispersion cycle.

**Synthesis of gold octahedrons in the presence of PDMAEMA (reaction C).** A PD solution of PDMAEMA (0.10 mL, 0.15 M) was added to boiling PD (5.0 mL). Immediately, a PD solution of  $\text{HAuCl}_4$  (0.2 mL, 0.05 M) was added to the reaction

mixture. The resulting mixture was refluxed for 1 h. The particles were precipitated by centrifugation, and were thoroughly washed with ethanol in a precipitation/dispersion cycle.

**Synthesis of gold cubes and cuboctahedrons in the presence of PDMAEMA.** A PD solution of AgNO<sub>3</sub> (0.15 mL) was added to boiling PD (5.0 mL). Then PDMAEMA (3.0 mL, 0.15 M) and HAuCl<sub>4</sub> (3.0 mL, 0.050 M) PD solutions were periodically added every 30 s over 7.5 min, and the mixture was refluxed for additional 1 h. The particles were precipitated by centrifugation, and were thoroughly washed with ethanol in a precipitation/dispersion cycle. The AgNO<sub>3</sub> concentrations used in the reactions were 10 mM (Ag/Au molar ratio = 1/100) for cubes and 5.0 mM (Ag/Au = 1/200) for cuboctahedrons.

**Synthesis of gold polygons for pH-induced assembly.** A PD solution of AgNO<sub>3</sub> (0.15 mL, 0.020 M) was added to boiling PD (31 mL). Then PDMAEMA (3.0 mL, 0.15 M) and HAuCl<sub>4</sub> (3.0 mL, 0.050 M) PD solutions were periodically added every 30 s over 7.5 min, and the mixture was refluxed for additional 1 h. The particles were precipitated by centrifugation, and were thoroughly washed with ethanol in a precipitation/dispersion cycle. The particles were finally dispersed in ethanol (30 mL).

**pH-induced assembly/disassembly experiments.** The gold polygons in ethanol (2.0 mL) were precipitated by centrifugation, and dispersed in NaOH solution in water (2 mL, pH 12) in a quartz cell mounted on a UV-Vis spectrophotometer. The solution was titrated either by HCl solution (0.25 M) or by NaOH solution (0.25 M) in order to set pH 2 and 12 of the particle dispersion, respectively. The extinction properties were measured by the UV-Vis spectrophotometer along repetitive acid and base titrations.

**Characterization.** Scanning electron microscopy (SEM) images were obtained using

a Philips XL30S FEG operated at 10 kV. X-ray photoelectron spectroscopy (XPS) studies were carried out using a VG ESCA2000 with a Mg K $\alpha$  source. FT-IR data were collected on a BRUKER EQUINOX55 spectrometer. Samples were prepared by a few drops of the colloidal solutions on a silicon wafer (P-100) followed by drying in air. The UV-Vis spectra were collected on a Jasco V530 UV-Vis spectrophotometer using the colloidal solutions in water.

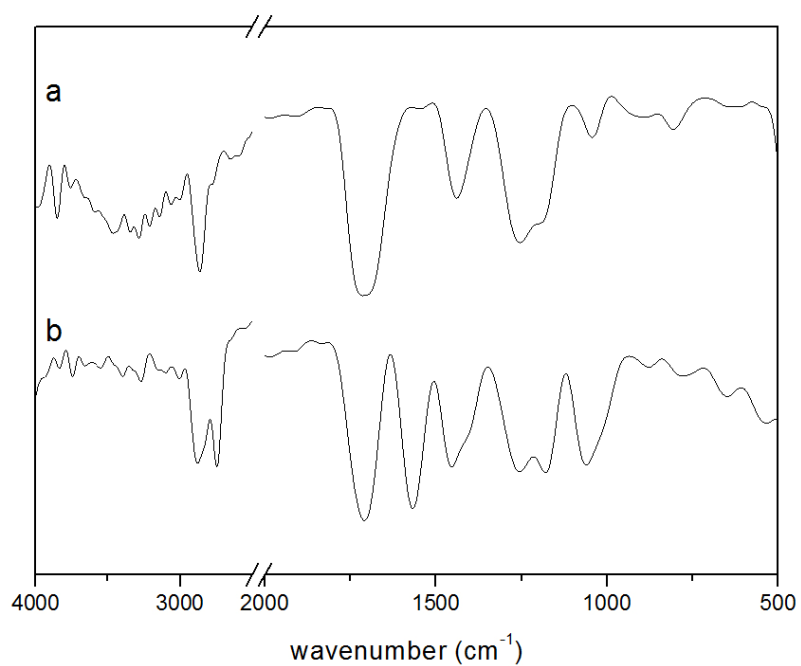

**Fig. S1** FTIR spectra of (a) pure PAA and (b) the product of the reaction with PAA and DMAE within 10 min.

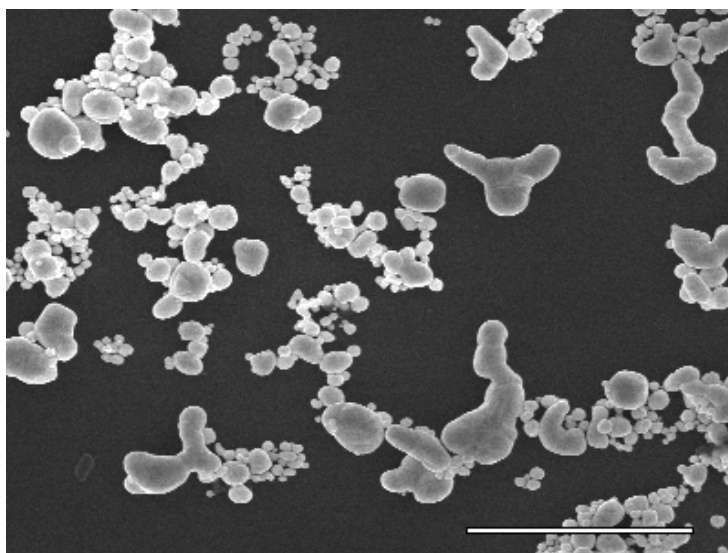

**Fig. S2** SEM image of the gold residue produced in the presence of PHEMA. The bar represents 2  $\mu\text{m}$ .

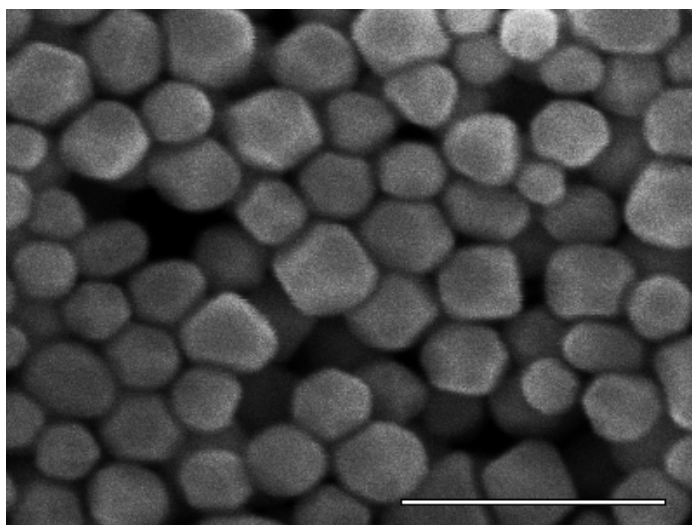

**Fig. S3** SEM image of gold cuboctahedrons synthesized in the presence of PDMAEMA.  
The bar represents 200 nm.

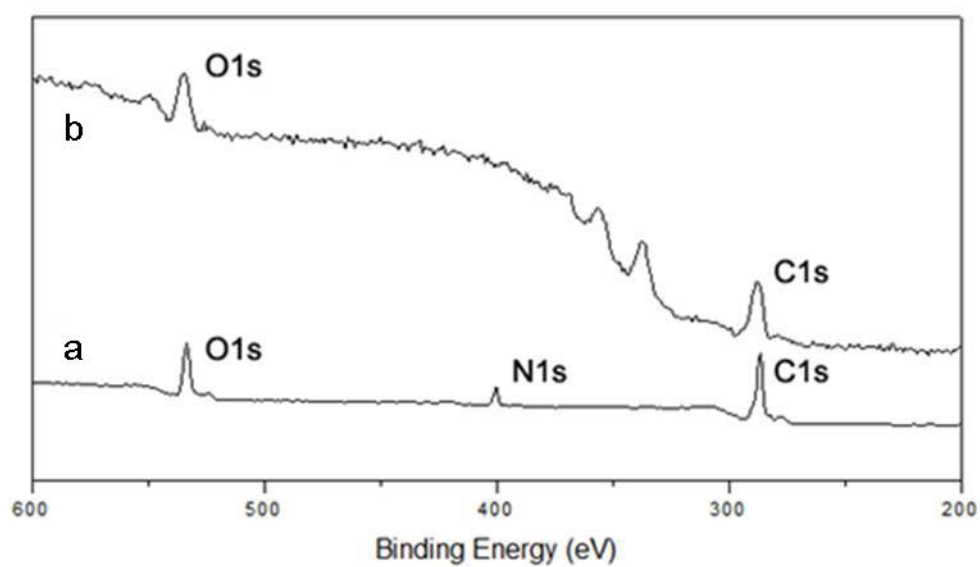

**Fig. S4** XPS survey scan of (a) free PDMAEMA and (b) the gold nanoparticles synthesized in the presence of PDMAEMA.

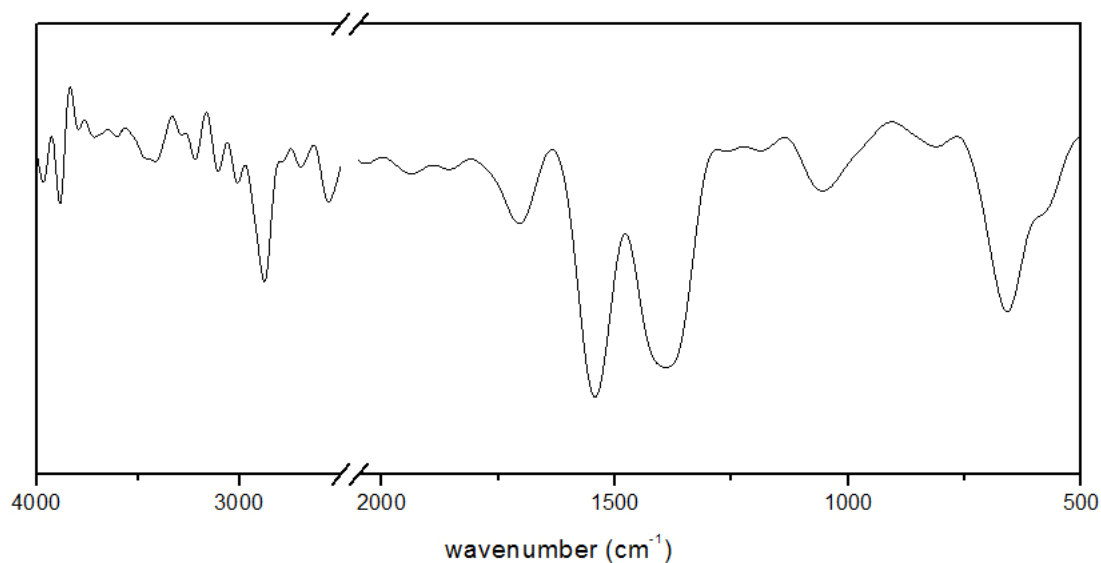

**Fig. S5** FTIR spectrum of gold nanocrystals synthesized by the reaction with PAA and DMAE after NaOH treatment.

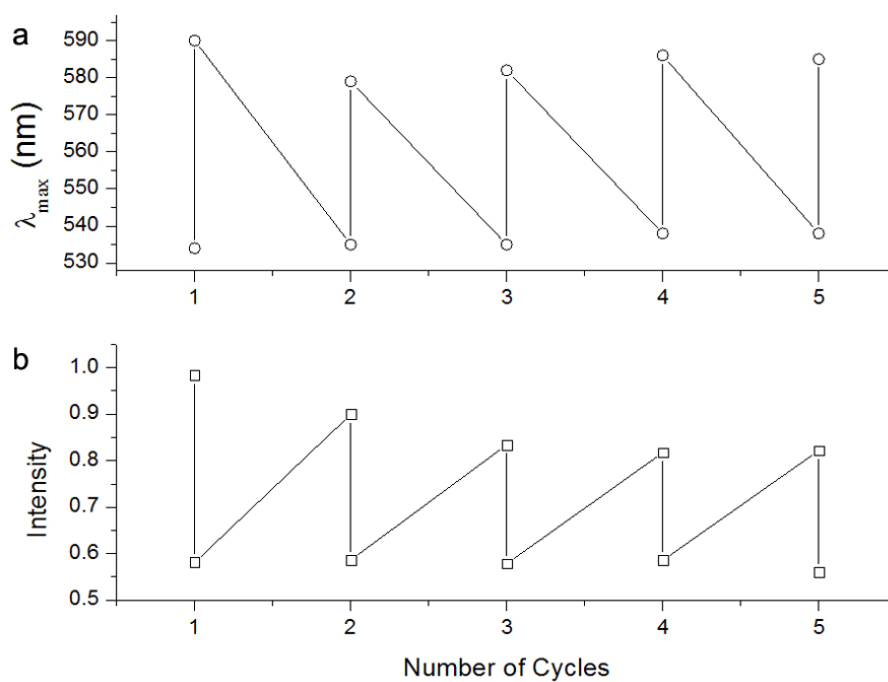

**Fig. S6** Cyclic changes of (a) the maximum position and (b) intensity in the extinction peak of gold nanocrystals during pH-dependent assembly/disassembly.
